# Supplementary material
Source: Springer Nature journal article supplement (https://www.springermedizin.de/resource/supplementary/12955_2007_377_MOESM3_ESM.pdf/9560268)

Original cards

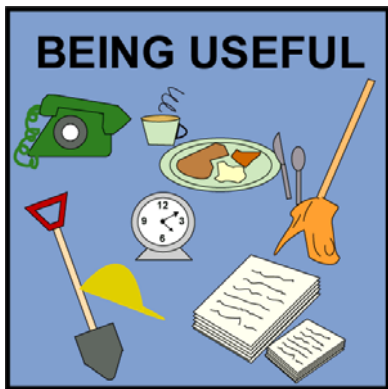

Revised cards

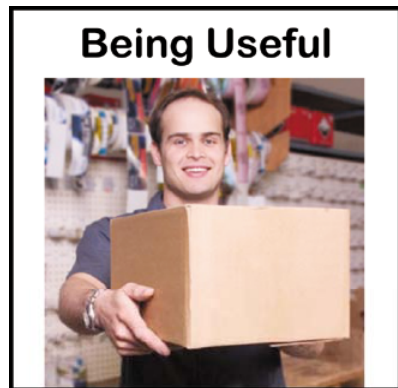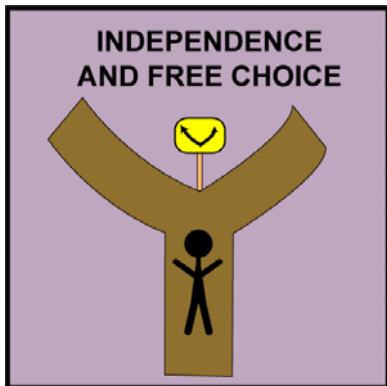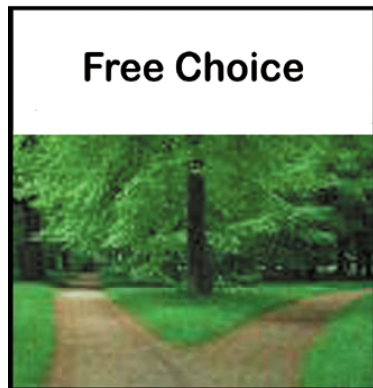

Supplement: MOESM3 [file 9560268]
